# Supplementary material for: Incidence and Outcomes of Nontraumatic Shock in Adults Using Emergency Medical Services in Victoria, Australia
Source: PubMed Central journal article supplement (PMC8792885; doi:10.1001/jamanetworkopen.2021.45179), 2022-01-26
Supplement: jamanetwopen-e2145179-s001.pdf [file jamanetwopen-e2145179-s001.pdf]

## Supplemental Online Content

Bloom JE, Andrew E, Dawson LP, et al. Incidence and outcomes of nontraumatic shock in adults using emergency medical services in Victoria, Australia. *JAMA Netw Open*. 2022;5(1):e2145179. doi:10.1001/jamanetworkopen.2021.45179

**eMethods.** Supplementary Methods

**eFigure 1.** Cohort Derivation: Study Flowchart

**eTable 1.** Reason for Patients Not Transferred to Hospital

**eTable 2.** Shock Incidence Stratified by Year

**eTable 3.** Sensitivity Analysis: Cardiogenic Shock with VACAR-Determined Prehospital Arrest vs No Prehospital Arrest

**eTable 4.** Thirty-Day Mortality Outcomes for Cardiogenic Shock With and Without VACAR-Determined Prehospital Cardiac Arrest

**eFigure 2.** Thirty-Day Kaplan-Meier Survival Estimates for Cardiogenic Shock With and Without VACAR-Determined Prehospital Cardiac Arrest

**eTable 5.** Obstructive Cause of Shock Etiology

**eTable 6.** Unadjusted 30-Day Mortality Including Obstructive Shock

**eTable 7.** Thirty-Day Mortality Adjusted by Age and Sex

This supplemental material has been provided by the authors to give readers additional information about their work.

## **eMethods. Supplementary Methods**

### *I. Dataset linkage processes*

For this study, data linkage was performed to combine electronic patient care record data with key Victorian datasets. These included:

1. **Victorian Emergency Minimum Dataset:** Victorian Department of Health administrative and clinical data related emergency department (ED) presentations at public hospitals in the state. Data is submitted by individual health services and is then subject to validation checks. For this study, EMS patient identifiers were matched with Department of Health identifiers using Dataflux software with deterministic data linkage and fuzzy matching for variables such as names and dates. ED presentations for matched patients were then linked to ambulance cases as follows:
  - a. Where the patient was transported to hospital by ambulance, the VEMD arrival time was required to be within one hour of the ambulance ED arrival time.
  - b. Where the patient contacted ambulance but was not transported to hospital, the VEMD arrival time was required to be within 48 hours of the emergency call for ambulance. If multiple VEMD records existed within the 48-hour period, the presentation occurring closest in time to the ambulance call was used.
2. **Victorian Admitted Episodes Dataset:** Victorian Department of Health demographic, clinical and administrative data relating to each admitted episode of care occurring in public and private hospitals, as well as rehabilitation centres, extended care facilities and day procedure centres in the state. For this study, EMS patient identifiers were matched with Department of Health identifiers using Dataflux software with deterministic data linkage and fuzzy matching for variables such as names and dates. For matched patients, individual admitted episodes of care occurring up to 48 hours after the emergency ambulance call were linked to the ambulance patient care record data. Where multiple admitted episodes were recorded within the 48 hours, the episode occurring closest in time to the ambulance call was used.
3. **Victorian Death Index:** Victorian Department of Health data capturing the date and cause of all deaths in Victoria. For matched patients, death records were then linked to all ambulance contacts occurring in the study period.

### *II: Study definitions:*

Socio-economic status was determined by The Index of Relative Socio-Economic Disadvantage Score (IRSD), a validated measure that ranks individual post-codes into deciles of relative disadvantage. This score is derived from Census data that includes household income, education level, employment status, occupation, housing ownership, and non-English speaking background(2). For this analysis, we divided the IRSD into quintiles, with the 1<sup>st</sup> quintile being the most disadvantaged (comprising of IRSD deciles 1 and 2) and the 5<sup>th</sup> quintile being least disadvantaged (IRSD deciles 9 and 10).

Geographic remoteness was determined through the residential area postcode of each event using The Accessibility and Remoteness Index of Australia (ARIA) – a geographic accessibility index that divides Australia into five classes of remoteness ('Major City', 'Inner Regional', 'Outer Regional', 'Remote', and 'Very Remote') to reflect relative access to services in non-metropolitan Australia(3).

Due to low numbers of patients from ‘remote’ or ‘very remote’ regions, these groups were combined with the ‘outer regional’ group for the purposes of this study.

Etiology of shock was defined in accordance with the final discharge diagnosis from hospital using the International Classification of Diseases (ICD) 10 AM codes. The ICD-10 codes used to identify patients with cardiogenic shock remain constant across the different ICD-10-AM editions of codes used by hospitals over the study period (i.e. ICD-10-AM: 8<sup>th</sup> edition in 2014-15; 9<sup>th</sup> edition in 2015-16 & 2016-17; 10<sup>th</sup> edition in 2017-18 & 2018-19).

#### Cardiogenic Shock:

1. Cardiovascular diagnoses: I00-I99
2. ST-elevation myocardial infarction: I210-I213, I220-I229, I256
3. Non-ST elevation myocardial infarction: I214, I219
4. Unstable angina: I200
5. Stable coronary syndromes: I201, I208, I209, I248-I252, I254, I255, I258, I259
6. Atrial fibrillation: I480-I489
7. Supraventricular tachycardia: I471
8. Other arrhythmia: I441, I442, I456, I458- I461, I469, I470, I472, I479, I490-I499
9. Heart failure: I420-I438, I500-I509
10. Myocarditis: I012, I090, I400-I418, I514,
11. Valvular heart disease: I050-I089, I340-I379, I390-I394
12. Other cardiac: I00-I1528 excluding codes categorised above
13. Other vascular: I600-I99 excluding codes categorised above

#### Septic shock:

1. Respiratory diagnoses: J00-J998
2. Pneumonia: J100, J110, J120-J189, J22
3. Asthma: J450-J46
4. Exacerbation of COPD: J431-J449, J47-J709, J982, J983
5. Other respiratory: J00-J998 excluding codes categorised above
6. Infectious diagnoses: A000-B99
7. Neoplastic diagnoses: C000-D899

#### Hypovolemic shock:

1. Aortic aneurysm or dissection: I7100-I7103, I711-I719
2. Gastrointestinal diagnoses: K000-K938
3. GORD, gastritis, oesophagitis: K20-K238, K290-K30
4. Peptic ulcer disease: K250-K289
5. Hepatobiliary: K700-K839, K870
6. Pancreatitis: K850-K869, K871
7. Other gastrointestinal: K000-K938 excluding codes categorised above

#### Other shock:

1. Rheumatological diagnoses: M0000-M99923
2. Mental Health diagnoses: F000-F99
3. Neurological diagnoses: G000-G998
4. Endocrine diagnoses: E000-E899

5. Other medical diagnoses: H000-H959, L00-L998, M0000-M99923, N000-N999, O000-O998, P000-Q999, S001-Z999
6. Pericarditis: I010, I092, I241, I300-I328
7. Non-specific pain: R000-R99
8. Pulmonary embolism: I260, I269
9. Pneumothorax: J930-J939

Procedures in Table 3 were defined according to ICD 10 V9.0 procedural codes as follows:

1. Coronary angiography: 3820300, 3820600, 382500, 3821800-3821802
2. Percutaneous coronary intervention: 3830600-3830605, 3831200, 3831201, 3831800, 3831801
3. Coronary artery bypass graft surgery: 3849700-3849707, 3850000-3850005, 3850300-3850305, 9020100-9020103
4. Extracorporeal membrane oxygenation (ECMO): 9022500
5. Intra-aortic balloon pump (IABP): 3836200

**Figure 1: Cohort Derivation: Study Flowchart**

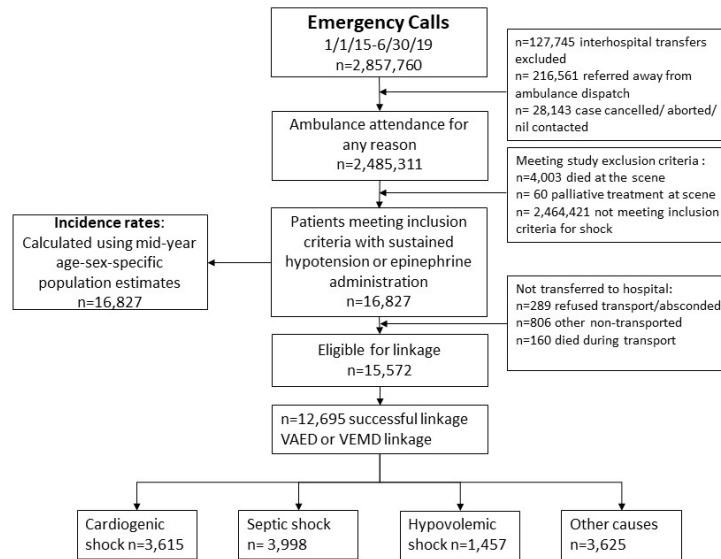

**Figure 1: Consort diagram of cohort derivation. VACIS=Victorian Ambulance clinical Information System, VAED=Victorian Admitted Episodes Database, VEMD=Victorian Emergency Minimum Dataset**

**eTable 1: Reason for Patients Not Transferred to Hospital**

| <b>Reasons Patient not transferred by Ambulance Crew Logging VACIS case</b> |               |
|-----------------------------------------------------------------------------|---------------|
| <b>Reason for not being transported</b>                                     | <b>number</b> |
| Died at the scene                                                           | 4003          |
| Bariatric patient                                                           | 6             |
| Cancelled after arrival                                                     | 16            |
| Other                                                                       | 543           |
| Transfer not required                                                       | 167           |
| Patient for palliative management only                                      | 60            |
| Referred to local medical officer                                           | 43            |
| Referred to other provider                                                  | 31            |
| Declined transport                                                          | 280           |
| Patient absconded                                                           | 9             |

**eTable 2. Shock Incidence Stratified by Year**

| Incidence of ambulance attendances for shock per 100,000 person-years over time      |           |         |           |         |           |         |           |         |           |         |                    |
|--------------------------------------------------------------------------------------|-----------|---------|-----------|---------|-----------|---------|-----------|---------|-----------|---------|--------------------|
|                                                                                      | 2015      |         | 2016      |         | 2017      |         | 2018      |         | 2019      |         |                    |
|                                                                                      | Incidence | 95%CI   | Incidence | 95%CI   | Incidence | 95%CI   | Incidence | 95%CI   | Incidence | 95%CI   | P <sub>trend</sub> |
| Total                                                                                | 94        | 92-97   | 84        | 81-86   | 66        | 64-69   | 65        | 63-67   | 67        | 64-70   | <0.001             |
| <b>Sex</b>                                                                           |           |         |           |         |           |         |           |         |           |         |                    |
| Male                                                                                 | 96        | 92-100  | 86        | 83-90   | 68        | 65-72   | 69        | 65-72   | 73        | 68-78   | <0.001             |
| Female                                                                               | 93        | 89-97   | 81        | 77-84   | 64        | 61-67   | 62        | 59-65   | 62        | 57-66   | <0.001             |
| <b>Age (years)</b>                                                                   |           |         |           |         |           |         |           |         |           |         |                    |
| 18-29                                                                                | 31        | 27-34   | 26        | 23-29   | 15        | 13-18   | 16        | 13-18   | 16        | 13-20   | <0.001             |
| 30-39                                                                                | 35        | 31-39   | 26        | 23-29   | 23        | 20-27   | 21        | 18-24   | 20        | 16-24   | <0.001             |
| 40-49                                                                                | 56        | 51-62   | 51        | 46-56   | 37        | 33-41   | 33        | 29-37   | 34        | 29-40   | <0.001             |
| 50-59                                                                                | 78        | 71-84   | 67        | 61-73   | 52        | 47-57   | 55        | 50-60   | 56        | 49-64   | <0.001             |
| 60-69                                                                                | 125       | 116-134 | 113       | 105-122 | 90        | 82-97   | 92        | 84-99   | 98        | 88-109  | <0.001             |
| 70-79                                                                                | 208       | 194-223 | 185       | 172-199 | 157       | 145-169 | 166       | 154-178 | 170       | 153-188 | <0.001             |
| 80+                                                                                  | 505       | 477-534 | 462       | 436-490 | 378       | 354-403 | 347       | 325-370 | 355       | 323-388 | <0.001             |
| Cochran-Armitage test used for p <sub>trend</sub><br>95% confidence interval (95%CI) |           |         |           |         |           |         |           |         |           |         |                    |

**eTable 3. Sensitivity Analysis: Cardiogenic Shock with VACAR-Determined Prehospital Arrest vs No Prehospital Arrest**

|                                                                                                                                                                                                        | All           | Cardiogenic Shock Without Cardiac Arrest | Cardiogenic Shock With Cardiac Arrest | p-value |
|--------------------------------------------------------------------------------------------------------------------------------------------------------------------------------------------------------|---------------|------------------------------------------|---------------------------------------|---------|
|                                                                                                                                                                                                        | N=3,615       | N=2,097                                  | N=1,518                               |         |
| Age                                                                                                                                                                                                    | 68.3 (16.1)   | 71.2 (15.9)                              | 64.1 (15.4)                           | <0.001  |
| Male                                                                                                                                                                                                   | 2,160 (59.8%) | 1,134 (54.1%)                            | 1,026 (67.6%)                         | <0.001  |
| Accessibility & Remoteness Index of Australia (ARIA)                                                                                                                                                   |               |                                          |                                       | 0.002   |
| Major Cities of Australia                                                                                                                                                                              | 2,600 (73.2%) | 1,478 (71.0%)                            | 1,122 (76.3%)                         |         |
| Inner Regional Australia                                                                                                                                                                               | 783 (22.0%)   | 494 (23.7%)                              | 289 (19.6%)                           |         |
| Outer Regional Australia                                                                                                                                                                               | 171 (4.8%)    | 111 (5.3%)                               | 60 (4.1%)                             |         |
| Index of Relative Socio-economic Disadvantage (IRSD)                                                                                                                                                   |               |                                          |                                       | 0.026   |
| 1                                                                                                                                                                                                      | 865 (26.8%)   | 541 (28.5%)                              | 324 (24.3%)                           |         |
| 2                                                                                                                                                                                                      | 690 (21.4%)   | 405 (21.3%)                              | 285 (21.4%)                           |         |
| 3                                                                                                                                                                                                      | 633 (19.6%)   | 373 (19.7%)                              | 260 (19.5%)                           |         |
| 4                                                                                                                                                                                                      | 561 (17.4%)   | 302 (15.9%)                              | 259 (19.4%)                           |         |
| 5                                                                                                                                                                                                      | 481 (14.9%)   | 277 (14.6%)                              | 204 (15.3%)                           |         |
| Hypertension                                                                                                                                                                                           | 1,348 (41.5%) | 843 (42.1%)                              | 505 (40.6%)                           | 0.41    |
| Dyslipidaemia                                                                                                                                                                                          | 841 (25.9%)   | 537 (26.8%)                              | 304 (24.5%)                           | 0.14    |
| Diabetes                                                                                                                                                                                               | 709 (21.8%)   | 434 (21.7%)                              | 275 (22.1%)                           | 0.76    |
| Coronary artery disease                                                                                                                                                                                | 835 (25.7%)   | 538 (26.9%)                              | 297 (23.9%)                           | 0.060   |
| Cardiac Failure                                                                                                                                                                                        | 439 (13.5%)   | 317 (15.8%)                              | 122 (9.8%)                            | <0.001  |
| Chronic Kidney Disease                                                                                                                                                                                 | 223 (6.9%)    | 168 (8.4%)                               | 55 (4.4%)                             | <0.001  |
| Peripheral Vascular Disease                                                                                                                                                                            | 52 (1.6%)     | 37 (1.8%)                                | 15 (1.2%)                             | 0.16    |
| Cerebrovascular Disease                                                                                                                                                                                | 240 (7.4%)    | 166 (8.3%)                               | 74 (6.0%)                             | 0.013   |
| Airways Disease                                                                                                                                                                                        | 320 (9.9%)    | 187 (9.3%)                               | 133 (10.7%)                           | 0.21    |
| Initial Systolic Blood Pressure (mmHg) – median [IQR]                                                                                                                                                  | NA            | 70 [58-80]                               | 0 [0-0]                               | NA      |
| Initial Heart Rate (BPM) – median [IQR]                                                                                                                                                                | 84 [50-124]   | 86 [60-127]                              | 80 [20-120]                           | <0.001  |
| Pre Hospital Intubation                                                                                                                                                                                | 1,385 (38.3%) | 69 (3.3%)                                | 1,316 (86.7%)                         | <0.001  |
| Adrenaline infusion commenced                                                                                                                                                                          | 1,960 (54.2%) | 607 (29.0%)                              | 1,353 (89.1%)                         | <0.001  |
| Maximum Adrenaline Infusion (mcg/min)                                                                                                                                                                  | 40.9 (57.0)   | 12.2 (11.7)                              | 53.0 (63.8)                           | <0.001  |
| * Pre-hospital cardiac arrest determined by Victorian Ambulance Cardiac Arrest Registry (VACAR)<br>Total numbers and percentages or mean ± standard deviation are presented unless otherwise indicated |               |                                          |                                       |         |



**eTable 4. Thirty-Day Mortality Outcomes for Cardiogenic Shock With and Without VACAR-Determined Prehospital Cardiac Arrest**

|                                                  | All (N=3,615) | Cardiogenic Shock Without Cardiac Arrest (N=2,097) | Cardiogenic Shock With Cardiac Arrest (N=1,518) | p-value |
|--------------------------------------------------|---------------|----------------------------------------------------|-------------------------------------------------|---------|
| 30-Day Mortality                                 | 1,563 (43.2%) | 502 (23.9%)                                        | 1,061 (69.9%)                                   | <0.001  |
| Median length of stay (days) – median [IQR]      | 3 [1-8]       | 3 [1-6]                                            | 4 [1-9]                                         | <0.001  |
| Median ICU length of stay (hours) – median [IQR] | 61 [27-117]   | 45 [22-94]                                         | 71 [26-133]                                     | <0.001  |

**eFigure 2. Thirty-Day Kaplan-Meier Survival Estimates for Cardiogenic Shock With and Without VACAR-Determined Prehospital Cardiac Arrest**

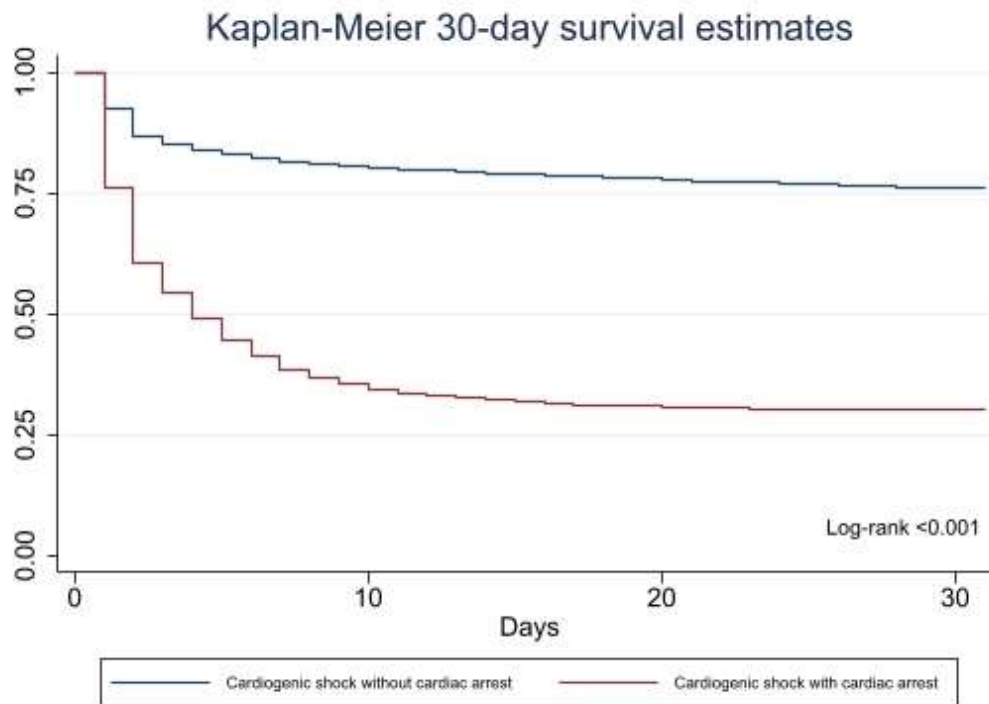

**eTable 5. Obstructive Cause of Shock Etiology**

Presented are patients with an ICD code consistent with obstructive shock – Pneumothorax (ICD 10: J930-J939) , Pericardial disease (ICD 10:I010, I092,I241,I300-I328) and pulmonary embolus (ICD 10: I260, I269). Within the primary analysis, these patients were included as “other” causes of shock:

| <b>Obstructive shock</b>     |               |
|------------------------------|---------------|
| <b>Cause (n=127)</b>         | <b>Number</b> |
| Pneumothorax                 | 5             |
| Pericardial disease/effusion | 17            |
| Pulmonary embolism           | 105           |

**Table 6. Unadjusted 30-Day Mortality Including Obstructive Shock**

| 30-day unadjusted mortality |     |         |
|-----------------------------|-----|---------|
|                             | HR* | 95%CI†  |
| Cardiogenic shock           | 2.9 | 2.5-3.2 |
| Septic Shock                | 2.3 | 2.1-2.6 |
| Hypovolemic Shock           | 1.7 | 1.5-1.9 |
| Obstructive Shock ‡         | 2.2 | 1.6-3.0 |
| Other Shock                 | REF | REF     |

\*Hazard ratios (HRs) derived using a Cox regression model with cardiogenic shock as the reference  
† 95% confidence interval (95%CI)  
‡ Obstructive shock has included ICD diagnoses for pulmonary embolus, pneumothorax and pericardial disease/tamponade

**eTable 7. Thirty-Day Mortality Adjusted by Age and Sex**

| 30-day mortality adjusted for age and sex                                                   |     |         |
|---------------------------------------------------------------------------------------------|-----|---------|
|                                                                                             | HR* | 95%CI†  |
| Cardiogenic shock                                                                           | 2.2 | 2.0-2.5 |
| Septic Shock                                                                                | 1.8 | 1.6-2.0 |
| Hypovolemic Shock                                                                           | 1.4 | 1.3-1.6 |
| Other Shock                                                                                 | REF | REF     |
| *Hazard ratios (HRs) derived using a Cox regression model with Other Shock as the reference |     |         |
| † 95% confidence interval (95%CI)                                                           |     |         |

**References:**

1. Nehme Z, Bernard S, Cameron P, Bray JE, Meredith IT, Lijovic M, et al. Using a Cardiac Arrest Registry to Measure the Quality of Emergency Medical Service Care. *Circ Cardiovasc Qual Outcomes*. 2015 Jan 1;8(1):56–66.
2. 2033.0.55.001 seifa 2011 technical paper.pdf [Internet]. [cited 2021 Jul 4]. Available from: [https://www.ausstats.abs.gov.au/ausstats/subscriber.nsf/0/22CEDA8038AF7A0DCA257B3B00116E34/\\$File/2033.0.55.001%20seifa%202011%20technical%20paper.pdf](https://www.ausstats.abs.gov.au/ausstats/subscriber.nsf/0/22CEDA8038AF7A0DCA257B3B00116E34/$File/2033.0.55.001%20seifa%202011%20technical%20paper.pdf)
3. 12160\_2006.pdf [Internet]. [cited 2021 Jul 4]. Available from: [https://www.ausstats.abs.gov.au/ausstats/subscriber.nsf/0/3E15ACB95DA01A65CA2571AA0018369F/\\$File/12160\\_2006.pdf](https://www.ausstats.abs.gov.au/ausstats/subscriber.nsf/0/3E15ACB95DA01A65CA2571AA0018369F/$File/12160_2006.pdf)
